# Supplementary material
Source: Research Square preprint supplement (doi:10.21203/rs.3.rs-9785745/v1)
Supplement: Supplementary file 1 [file 3fcf1924b558b8c4211f5e30.docx]

**VARIABLE CODEBOOK**

**1. Quantitative Variables**

**1.1 Participant Demographics and Context**

| **Variable Name** | **Label** | **Type** | **Coding / Values** | **Transformations** | **Explanation** |
| --- | --- | --- | --- | --- | --- |
| ID | Participant identifier | Nominal | 1 to 187 | - | Unique anonymous ID |
| District | FDC location | Nominal | 1 = Njombe  2 = Wanging'ombe | - | Two colleges in Njombe Region, Tanzania |
| Year of study | Year | Ordinal | 1 = First year  2 = Second year  3 = Short‑course | - | Short‑course < 6 months |
| Gender | Self‑reported gender | Nominal | 1 = Male, 2 = Female | - | No non‑binary category |
| Attended career counseling session | Ever attended a career counseling session | Nominal | 1 = Yes, 2 = No | - | 184 Yes  3 No - insufficient variation for analysis |
| Session duration | Typical length of session | Ordinal | 1 = <10 min  2 = 10‑30 min  3 = >30 min | Mean = 2.79 | Only for those who attended |
| Session mode | Primary delivery mode | Nominal | 1 = Group  2 = Individual  3 = Both | Mean = 2.28 | Only for those who attended |

**1.2 Career Counseling Literacy (KCS Scale)**

**Name of the scale:** Knowledge of Career Services (KCS)
**Number of items:** 6
**Response scale:** 1 = Strongly disagree, 2 = Disagree, 3 = Neutral, 4 = Agree, 5 = Strongly agree
**Reliability (Cronbach’s α):** 0.795

**Items:**

- KCS1: I know which tutor or staff member to approach for career guidance at my college.
- KCS2: I am aware of the types of career counseling services available to students
- KCS3: I understand the role of a career counselor
- KCS4: I know how to schedule an appointment with a career counselor
- KCS5: I am aware of financial barriers that might affect my career progression
- KCS6: I know where to seek help when I face obstacles in career planning

| **Variable** | **Definition** | **Coding** | **Transformation** |
| --- | --- | --- | --- |
| KCS_Avg | Mean score of 6 KCS items | Continuous, 1–5 | Computed as (KCS1+KCS2+KCS3+KCS4+KSC5+KCS6)/6  Missing if >2 items missing (no missing in this dataset) |

**1.3 Perceived Barriers**

**a) Structural Barriers (SB)**

**Number of items:** 3

**Response scale:** 1 = Strongly disagree, 2 = Disagree, 3 = Neutral, 4 = Agree, 5 = Strongly agree
**Cronbach’s α =** 0.870

**Items (3):**

- SB1: I feel uncomfortable discussing personal career concerns with a counselor.
- SB2: I worry that the counselor will judge my career choices or background.
- SB3: I lack the confidence to ask the right questions during a counseling session.

| **Variable** | **Definition** | **Coding** | **Transformation** |
| --- | --- | --- | --- |
| SB_Avg | Mean of 3 structural barrier items | Continuous, 1–5 | (SB1+SB2+SB3)/3 |

**b) Informational Barriers (IB)**

**Number of items:** 4

**Response scale:** 1 = Strongly disagree, 2 = Disagree, 3 = Neutral, 4 = Agree, 5 = Strongly agree
**Cronbach’s α =** 0.836

**Items (4):**

- IB1: I do not know what specific services the career guidance unit provides.
- IB2: Information about career counseling is not clearly communicated to students
- IB3: I am unsure how to initiate contact with a career counselor.
- IB4: There is no clear procedure for accessing career guidance at my college.

| **Variable** | **Definition** | **Coding** | **Transformation** |
| --- | --- | --- | --- |
| IB_Avg | Mean of 4 informational barrier items | Continuous, 1–5 | (IB1+IB2+IB3+IB4)/4 |

**c) Personal Barriers (PB)**

**Number of items:** 4

**Response scale:** 1 = Strongly disagree, 2 = Disagree, 3 = Neutral, 4 = Agree, 5 = Strongly agree
**Cronbach’s α =** 0.842

**Items (4):**

- PB1: I feel uncomfortable discussing personal career concerns with a counselor.
- PB2: I worry that the counselor will judge my career choices or background.
- PB3: I doubt that career counseling can actually help someone like me.
- PB4: I lack the confidence to ask the right questions during a counseling session.

| **Variable** | **Definition** | **Coding** | **Transformation** |
| --- | --- | --- | --- |
| PB_Avg | Mean of 4 personal barrier items | Continuous, 1–5 | (PB1+PB2+PB3+PB4)/4 |

**1.4 Perceived Benefits (PBenSSF)**

**Scale name:** Perceived Benefits of Career Counseling (Short Form)
**Number of items:** 5

**Response scale:** 1 = Strongly disagree, 2 = Disagree, 3 = Neutral, 4 = Agree, 5 = Strongly agree
**Cronbach’s α =** 0.817

**Items (5):**

- PBenSSF1: Career counseling would help me make more informed decisions about my career path.
- PBenSSF2: Talking to a counselor would clarify my confusion about which jobs suit me.
- PBenSSF3: Career counseling would improve my chances of finding a job after graduation.
- PBenSSF4: I would feel more confident choosing a career after receiving counseling.
- PBenSSF5: Career counseling would reduce my anxiety about future employment.

| **Variable** | **Definition** | **Coding** | **Transformation** |
| --- | --- | --- | --- |
| PBenSSF_Avg | Mean of 5 perceived benefit items | Continuous, 1–5 | (PBenSSF1+ PBenSSF2+ PBenSSF3+ PBenSSF4+ PBenSSF5)/5 |

**2. The derived variables used in hypothesis testing**

| **Variable** | **Derivation** | **Purpose** |
| --- | --- | --- |
| Year_group_factor | Convert Year_of_study (1,2,3) to factor with labels | ANOVA grouping |
| Gender_factor | Convert Gender (1,2) to factor | Independent t-test |
| Literacy_high_low | Median split of KCS_Avg (Median = 3.33) | Optional sensitivity analysis (not reported in main paper) |

**3. Qualitative Coding Scheme (Reflexive Thematic Analysis)**

The qualitative data (interview transcripts, focus group discussions) were analyzed using Braun & Clarke’s (2021) reflexive thematic analysis. No intercoder reliability was calculated, themes were developed inductively by the lead researcher, with member checking by 5 students.

**3.1 Codebook for qualitative themes (based on final themes)**

| **Theme Name** | **Definition** | **Example Quote (ID)** | **Sub-codes** |
| --- | --- | --- | --- |
| **Conceptual confusion** | Participants use “guidance” and “counseling” interchangeably; lack distinction between general advice and professional counseling | *“In the streets, we are getting career counseling from different people… parents, friends, even teachers”* (FGD_Student_03) | guidance-as-advice; counseling-as-emotional-support; professional-vs-lay |
| **Unstructured delivery** | No formal career counselor; services are reactive, unscheduled, and mainly orientation-based | *“We do not have a coherent approach… I have no listed career programs to run”* (Training Coordinator_FDC_A) | orientation-only; no schedule; reactive only |
| **Structural barriers** | Workload, lack of dedicated staff, financial constraints | *“Training coordinator had only 10 minutes to spend with me”* (Student_2ndYr_07) | heavy workloads; no budget; no counselor position |
| **Informational barriers** | Students do not know what services exist or how to access them | *“I do not know what specific services does career guidance provides”* (Student_SC_02) | no procedure; no signage; unclear contact person |
| **Personal barriers** | Shyness, parental pressure, lack of perceived need | *“My parents have already determined my career path”* (Student_1stYr_11) | shyness; family determinism; low self-efficacy |
| **Reliance on experience** | Training coordinators use accumulated teaching experience, not formal counseling training | *“I am a carpenter… but I have been a tutor for a long time so I know them well”* (Training Coordinator_FDC_B) | no training; seniority as credential; underutilized expertise |

**4. Data Transformations Applied**

| **Original Variable** | **Transformation** | **Justification** |
| --- | --- | --- |
| Raw Likert items (1–5) | Mean aggregation per scale | Reduce dimensionality, create interpretable scale scores |
| Year_of_study | Retained as numeric (1,2,3) for ANOVA | ANOVA requires categorical grouping |
| Gender | Recoded from text (Male/Female) to 1/2 | SPSS numeric analysis |
| Attended_session | Code included: 1 = Yes, 2 = No | But only 3 said No; not used in inferential tests |
| Qualitative transcripts | Anonymized: names (Participants’ role), places → (FDC A/B) | Ethical compliance |
