# Supplementary material
Source: Research Square preprint supplement (doi:10.21203/rs.3.rs-9785745/v1)
Supplement: Supplementary file 2 [file d9bdeb136f7f3336ed79d97d.docx]

**SPSS syntax files for all analyses (ANOVA, t-test, Pearson correlations)**

Cronbach Alpha: KCA: .795

SB: .870

IB: .836

PB: .842

PBenSSF: .817

**H1:** **Career counseling literacy scores differ significantly across years of study (first‑year, second‑year, and short‑course students).**

| **Descriptives** | | | | | | | | |
| --- | --- | --- | --- | --- | --- | --- | --- | --- |
| KCS_Avg | | | | | | | | |
|  | N | Mean | Std. Deviation | Std. Error | 95% Confidence Interval for Mean | | Minimum | Maximum |
| Lower Bound | Upper Bound |
| First year | 62 | 3.0269 | .53323 | .06772 | 2.8915 | 3.1623 | 1.50 | 4.67 |
| Second year | 76 | 3.9430 | .59039 | .06772 | 3.8081 | 4.0779 | 2.33 | 5.00 |
| Short course | 49 | 3.0340 | .57633 | .08233 | 2.8685 | 3.1996 | 1.50 | 4.50 |
| Total | 187 | 3.4011 | .72227 | .05282 | 3.2969 | 3.5053 | 1.50 | 5.00 |

| **Test of Homogeneity of Variances** | | | |
| --- | --- | --- | --- |
| KCS_Avg | | | |
| Levene Statistic | df1 | df2 | Sig. |
| .069 | 2 | 184 | .934 |

| **ANOVA** | | | | | |
| --- | --- | --- | --- | --- | --- |
| KCS_Avg | | | | | |
|  | Sum of Squares | df | Mean Square | F | Sig. |
| Between Groups | 37.602 | 2 | 18.801 | 58.210 | .000 |
| Within Groups | 59.429 | 184 | .323 |  |  |
| Total | 97.031 | 186 |  |  |  |

| **Multiple Comparisons** | | | | | | |
| --- | --- | --- | --- | --- | --- | --- |
| Dependent Variable: KCS_Avg  Tukey HSD | | | | | | |
| (I) Yearofstudy | (J) Yearofstudy | Mean Difference (I-J) | Std. Error | Sig. | 95% Confidence Interval | |
| Lower Bound | Upper Bound |
| First year | Second year | -.91610* | .09726 | .000 | -1.1459 | -.6863 |
| Short course | -.00713 | .10863 | .998 | -.2638 | .2495 |
| Second year | First year | .91610* | .09726 | .000 | .6863 | 1.1459 |
| Short course | .90897* | .10412 | .000 | .6629 | 1.1550 |
| Short course | First year | .00713 | .10863 | .998 | -.2495 | .2638 |
| Second year | -.90897* | .10412 | .000 | -1.1550 | -.6629 |
| *. The mean difference is significant at the 0.05 level. | | | | | | |

| **KCS_Avg** | | | |
| --- | --- | --- | --- |
| Tukey HSD | | | |
| Yearofstudy | N | Subset for alpha = 0.05 | |
| 1 | 2 |
| First year | 62 | 3.0269 |  |
| Short course | 49 | 3.0340 |  |
| Second year | 76 |  | 3.9430 |
| Sig. |  | .997 | 1.000 |
| Means for groups in homogeneous subsets are displayed. | | | |
| a. Uses Harmonic Mean Sample Size = 60.368. | | | |
| b. The group sizes are unequal. The harmonic mean of the group sizes is used. Type I error levels are not guaranteed. | | | |

**H2: There is no significant difference in career counseling literacy between male and female students.**

**T-Test**

| **Group Statistics** | | | | | |
| --- | --- | --- | --- | --- | --- |
|  | Gender | N | Mean | Std. Deviation | Std. Error Mean |
| KCS_Avg | Male | 83 | 3.3896 | .74366 | .08163 |
| Female | 104 | 3.4103 | .70822 | .06945 |

| **Independent Samples Test** | | | | | | | | | | |
| --- | --- | --- | --- | --- | --- | --- | --- | --- | --- | --- |
|  | | Levene's Test for Equality of Variances | | t-test for Equality of Means | | | | | | |
| F | Sig. | t | df | Sig. (2-tailed) | Mean Difference | Std. Error Difference | 95% Confidence Interval of the Difference | |
| Lower | Upper |
| KCS_Avg | Equal variances assumed | .060 | .807 | -.194 | 185 | .846 | -.02070 | .10658 | -.23097 | .18958 |
| Equal variances not assumed |  |  | -.193 | 171.948 | .847 | -.02070 | .10717 | -.23224 | .19084 |

**H3:** **Career counseling literacy is negatively correlated with perceived barriers (structural, informational, personal) and positively correlated with perceived benefits of career counseling.**

| **Correlations** | | | | | | |
| --- | --- | --- | --- | --- | --- | --- |
|  | | KCS_Avg | SB_Avg | IB_Avg | PB_Avg | PBenSSF_Avg |
| KCS_Avg | Pearson Correlation | 1 | -.386** | -.493** | -.448** | .565** |
| Sig. (2-tailed) |  | .000 | .000 | .000 | .000 |
| N | 187 | 187 | 187 | 187 | 187 |
| SB_Avg | Pearson Correlation | -.386** | 1 | .330** | .280** | -.255** |
| Sig. (2-tailed) | .000 |  | .000 | .000 | .000 |
| N | 187 | 187 | 187 | 187 | 187 |
| IB_Avg | Pearson Correlation | -.493** | .330** | 1 | .352** | -.464** |
| Sig. (2-tailed) | .000 | .000 |  | .000 | .000 |
| N | 187 | 187 | 187 | 187 | 187 |
| PB_Avg | Pearson Correlation | -.448** | .280** | .352** | 1 | -.294** |
| Sig. (2-tailed) | .000 | .000 | .000 |  | .000 |
| N | 187 | 187 | 187 | 187 | 187 |
| PBenSSF_Avg | Pearson Correlation | .565** | -.255** | -.464** | -.294** | 1 |
| Sig. (2-tailed) | .000 | .000 | .000 | .000 |  |
| N | 187 | 187 | 187 | 187 | 187 |
| **. Correlation is significant at the 0.01 level (2-tailed). | | | | | | |

| **Descriptive Statistics** | | | | | |
| --- | --- | --- | --- | --- | --- |
|  | N | Minimum | Maximum | Mean | Std. Deviation |
| District | 187 | 1 | 2 | 1.56 | .498 |
| Yearofstudy | 187 | 1 | 3 | 1.93 | .769 |
| Gender | 187 | 1 | 2 | 1.56 | .498 |
| Careerguidancesessionattendance | 187 | 1 | 1 | 1.00 | .000 |
| IfYesFrequency | 187 | 1 | 3 | 1.39 | .561 |
| Sessiondurationforlastvisit | 187 | 1 | 3 | 2.79 | .457 |
| Modeofcounselingreceived | 187 | 1 | 4 | 2.28 | .733 |
| KCS_Avg | 187 | 1.50 | 5.00 | 3.4011 | .72227 |
| SB_Avg | 187 | 1.00 | 5.00 | 3.4456 | 1.17465 |
| IB_Avg | 187 | 1.25 | 5.00 | 3.3703 | 1.08334 |
| PB_Avg | 187 | 1.00 | 5.00 | 3.2701 | 1.05300 |
| PBenSSF_Avg | 187 | 1.00 | 5.00 | 3.4449 | .93401 |
| Valid N (listwise) | 187 |  |  |  |  |
